# Supplementary material for: Effects of Aflibercept for Neovascular Age-Related Macular Degeneration: A Systematic Review and Meta-Analysis of Observational Comparative Studies
Source: PubMed Central journal article supplement — Invest Ophthalmol Vis Sci. 2017 Nov;58(13):5616–27. doi: 10.1167/iovs.17-22471 (PMC5667400; doi:10.1167/iovs.17-22471), 2017-11
Supplement: IOVS-17-22471-s01.pdf [file IOVS-17-22471-s01.pdf]

**Supplementary Table S1. Terms used for literature search**

| Database             | Search items                                                                                                                                                                                                                                                                                                                                                                                                                                                                                       |
|----------------------|----------------------------------------------------------------------------------------------------------------------------------------------------------------------------------------------------------------------------------------------------------------------------------------------------------------------------------------------------------------------------------------------------------------------------------------------------------------------------------------------------|
| <p><b>PubMed</b></p> | <p>(Macular Degeneration [MeSH] OR Macular Degeneration [text word] OR Macular Degenerations [text word] OR Age-Related Maculopathies [text word] OR Macular Dystrophy[text word] OR Macular Dystrophies [text word] OR Age-Related Macular Degeneration[text word] OR Age-Related Macular Degenerations[text word] OR Age-Related Maculopathy [text word] OR Age-Related Maculopathies [text word]) AND (aflibercept [Supplementary Concept] OR aflibercept [text word] OR eylea [text word])</p> |
| <p><b>Embase</b></p> | <p>('macular degeneration' OR 'macular degenerations' OR 'macular dystrophy' OR 'macular dystrophies' OR 'macular atrophy' OR 'macular atrophies' OR 'atrophia maculae luteae' OR 'bilateral macular degeneration' OR 'degeneratio maculae luteae retinae' OR 'disciform macular degeneration' OR 'heredomacular degeneration') AND ('aflibercept' OR 'eylea')</p>                                                                                                                                 |

**Supplementary Table S2. Quality Assessment of cohort studies based on Newcastle Ottawa Scale**

| Study ID             | Sample Size                                                                                                                                                                     | Selection |    |    |        | Comparability |    | Outcome |    |    | Total Stars |
|----------------------|---------------------------------------------------------------------------------------------------------------------------------------------------------------------------------|-----------|----|----|--------|---------------|----|---------|----|----|-------------|
|                      |                                                                                                                                                                                 | S1        | S2 | S3 | S4 (a) | C1            | C2 | O1      | O2 | O3 |             |
| Au et al. 2016       | 88 eyes<br>(Ranibizumab group: 23<br>Aflibercept group: 30<br>bevacizumab: 35)                                                                                                  | *         | *  | †  | *      | *             |    | *       | *  | *  | 7           |
| Balaskas et al. 2016 | 102 patients<br>(Ranibizumab group: 50<br>Aflibercept group: 52)                                                                                                                | *         | *  | *  | *      | *             |    | *       | *  | *  | 8           |
| Cho et al. 2016      | 98 eyes<br>(Ranibizumab group: 60<br>Aflibercept group: 38)                                                                                                                     | *         | *  | *  | *      | *             | *  | *       | *  | *  | 9           |
| Dirani et al. 2015   | 115 eyes<br>(Ranibizumab group: 68<br>Aflibercept group: 47)                                                                                                                    | *         | *  | †  | *      |               |    | *       | *  |    | 5           |
| Garweg et al 2017    | 153 eyes<br>(Ranibizumab group: 47<br>Aflibercept group: 106)                                                                                                                   | *         | *  | *  | *      |               |    | *       | *  | *  | 7           |
| Gillies et al. 2016  | 394 eyes<br>(Ranibizumab group: 197<br>Aflibercept group: 197)                                                                                                                  | *         | *  | *  | *      | *             |    | *       | *  | *  | 8           |
| Hata et al. 2014     | 216 eyes<br>(Ranibizumab group: 133<br>Aflibercept group: 83)                                                                                                                   | *         | *  | *  | *      |               | *  | *       | *  | *  | 8           |
| Inoue et al. 2016    | 200 eyes<br>(Ranibizumab group: 99<br>Aflibercept group: 101)                                                                                                                   | *         | *  | †  | *      |               | *  | *       | *  | *  | 7           |
| Kano et al. 2015     | 103 eyes<br>(Ranibizumab group: 74<br>Aflibercept group: 29)                                                                                                                    | *         | *  | *  | *      | *             | *  | *       | *  |    | 8           |
| Kim et al. 2016      | 51 eyes<br>(Ranibizumab group: 30<br>Aflibercept group: 21)                                                                                                                     | *         | *  | †  | *      | *             | *  | *       | *  | *  | 8           |
| Lee et al. 2017      | 1884 eyes<br>(Ranibizumab group: 942<br>Aflibercept group: 942)                                                                                                                 | *         |    | *  | *      |               | *  | *       | *  | *  | 7           |
| Notes                | †. Based on the method description, the exposure should be estimated based on medical records, but no detailed description about source of assessment was found in the context. |           |    |    |        |               |    |         |    |    |             |

**Supplementary Table S2. Quality Assessment of cohort studies based on Newcastle Ottawa Scale (continued)**

| Study ID              | Sample Size                                                                                                                                                                     | Selection |    |    |        | Comparability |    | Outcome |    |    | Total Stars |
|-----------------------|---------------------------------------------------------------------------------------------------------------------------------------------------------------------------------|-----------|----|----|--------|---------------|----|---------|----|----|-------------|
|                       |                                                                                                                                                                                 | S1        | S2 | S3 | S4 (a) | C1            | C2 | O1      | O2 | O3 |             |
| Lotery et al. 2017    | 7650 eyes<br>(Ranibizumab group: 3350<br>Aflibercept group: 4300)                                                                                                               | *         | *  | *  | *      |               |    | *       | *  | *  | 7           |
| Miyamoto et al. 2017  | 148 eyes<br>(Ranibizumab group: 77<br>Aflibercept group: 71)                                                                                                                    | *         | *  | *  | *      |               |    | *       | *  | *  | 7           |
| Park et al. 2016      | 232 eyes<br>(Ranibizumab group: 87<br>Aflibercept group: 74<br>bevacizumab: 71)                                                                                                 |           | *  | †  | *      | *             | *  | *       | *  |    | 6           |
| Rasmussen et al. 2017 | 1143 eyes<br>(Ranibizumab group: 616<br>Aflibercept group: 527)                                                                                                                 | *         | *  | *  | *      | *             |    | *       | *  | *  | 8           |
| Selid et al. 2014     | 202 eyes<br>(Bevacizumab group: 111<br>Aflibercept group: 91)                                                                                                                   | *         | *  | *  | *      | *             | *  | *       | *  | *  | 9           |
| Subhi et al. 2017     | 106 eyes<br>(Ranibizumab group: 57<br>Aflibercept group: 49)                                                                                                                    | *         | *  | *  | *      |               |    | *       | *  |    | 6           |
| Yun et al. 2016       | 54 eyes<br>(Ranibizumab group: 33<br>Aflibercept group: 21)                                                                                                                     | *         | *  | *  | *      |               | *  | *       | *  |    | 7           |
| Notes                 | †. Based on the method description, the exposure should be estimated based on medical records, but no detailed description about source of assessment was found in the context. |           |    |    |        |               |    |         |    |    |             |

**Supplementary Figure S3. Funnel plot of the differences in LogMAR changes after aflibercept and ranibizumab treatment at 3(A), 6(B), 12(C), and 24(D) months**

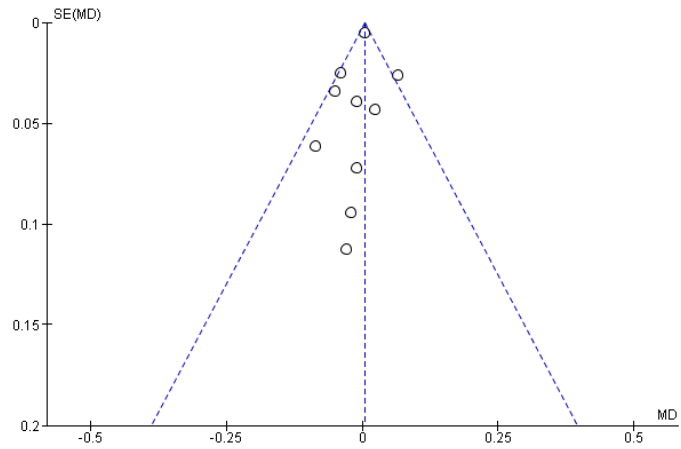

**A.**

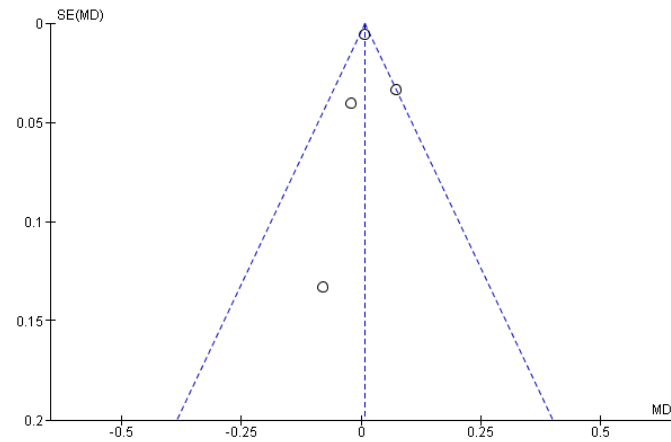

**B.**

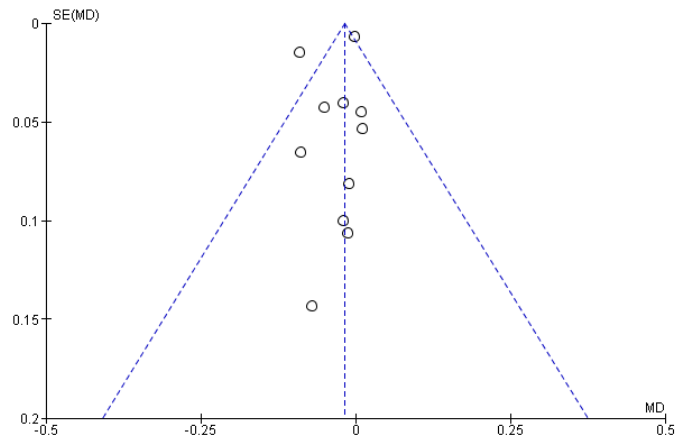

**C.**

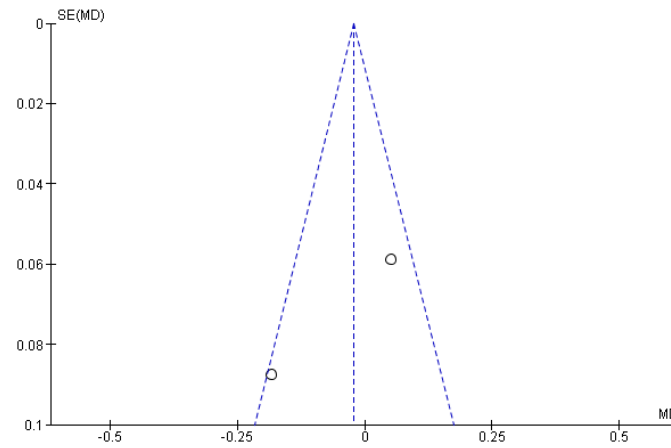

**D.**

**Supplementary Figure S4. Funnel plot of the differences in CRT changes after aflibercept and ranibizumab treatment at 3(A), 6(B), 12(C), and 24(D) months**

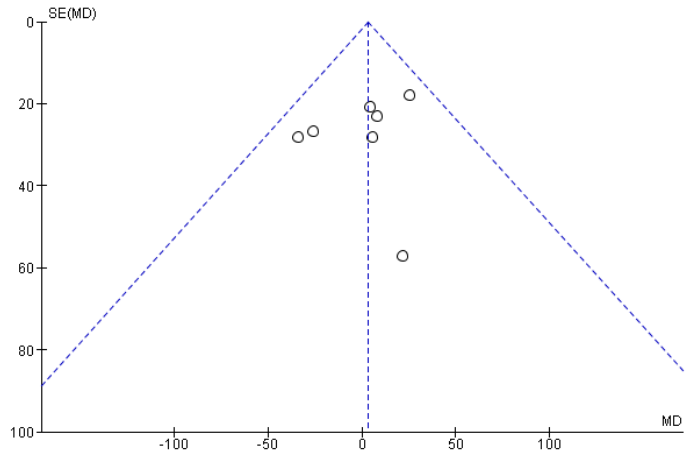

**A.**

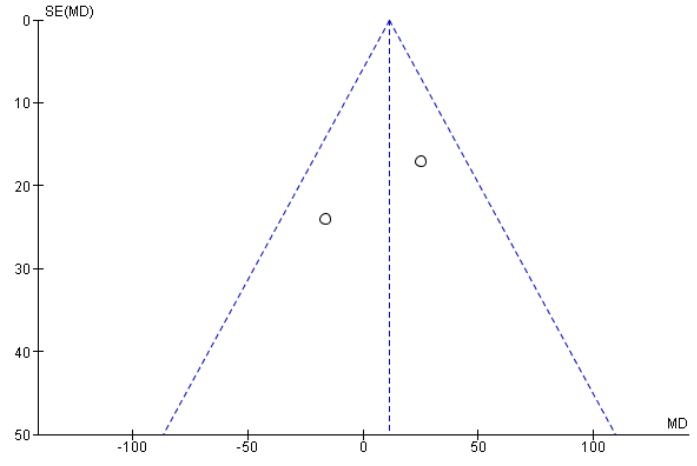

**B.**

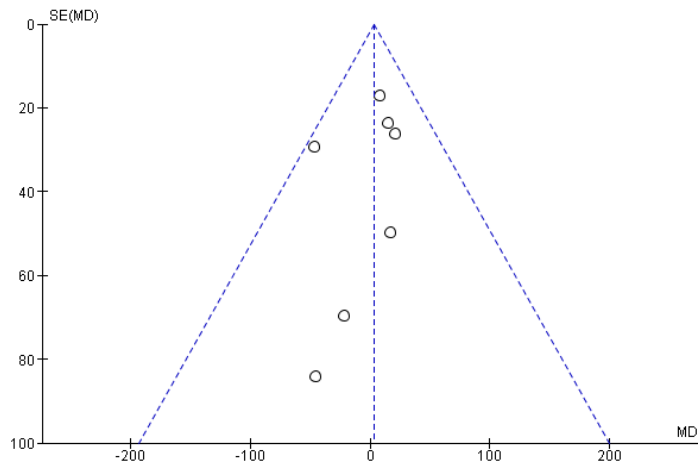

**C.**

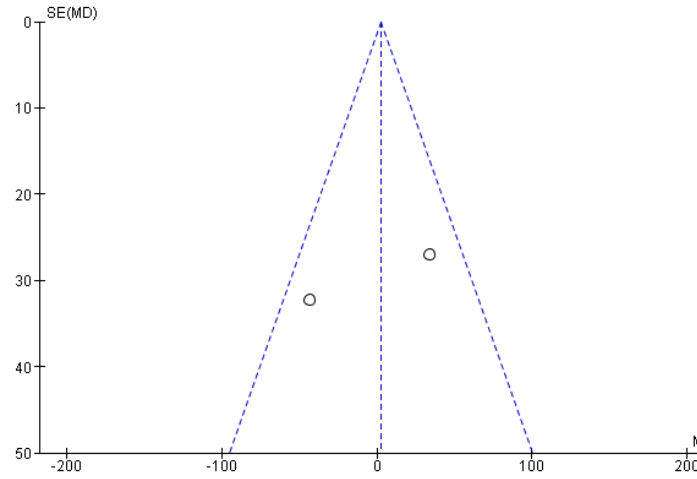

**D.**

**Supplementary Table S5. Subgroup Analysis at 12-month of follow up (sensitivity analysis)**

|                            |                                                                                                                                                                                            | LogMAR change (95% CI) after aflibercept therapy |                         | Number of injections |                         |
|----------------------------|--------------------------------------------------------------------------------------------------------------------------------------------------------------------------------------------|--------------------------------------------------|-------------------------|----------------------|-------------------------|
|                            |                                                                                                                                                                                            | Compared to baseline                             | Compared to ranibizumab | Compared to baseline | Compared to ranibizumab |
| <b>Age (years)</b>         | < 75                                                                                                                                                                                       | -0.14 (-0.18 to -0.09)                           | -0.04 (-0.10 to 0.03)   | 4.97 (4.37 to 5.57)  | -0.87 (-2.21 to 0.47)   |
|                            | 75-85                                                                                                                                                                                      | -0.07 (-0.13 to 0.02)                            | 0.00 (-0.10 to 0.10)    | 9.00 (5.78 to 12.22) | 0.58 (-0.12 to 1.28)    |
|                            | ≥ 85                                                                                                                                                                                       | -0.08 (-0.17 to 0.02)                            | -0.09 (-0.22 to 0.04)   | Not available        | Not available           |
| <b>Baseline LogMAR</b>     | ≤ 0.6                                                                                                                                                                                      | -0.09 (-0.14 to -0.05)                           | -0.03 (-0.09 to 0.03)   | 7.53 (5.31 to 9.75)  | 0.32 (-0.15 to 0.79)    |
|                            | > 0.6                                                                                                                                                                                      | -0.12 (-0.14 to -0.11)                           | -0.08 (-0.11 to -0.06)  | 5.47 (4.16 to 6.78)  | -0.69 (-2.34 to 0.96)   |
| <b>Study areas</b>         | Asia                                                                                                                                                                                       | -0.14 (-0.18 to -0.09)                           | -0.04 (-0.10 to 0.03)   | 4.97 (4.37 to 5.57)  | -0.87 (-2.21 to 0.47)   |
|                            | Europe                                                                                                                                                                                     | -0.11 (-0.14 to -0.08)                           | -0.07 (-0.13 to -0.01)  | 7.22 (6.74 to 7.71)  | 0.32 (-0.81 to 1.46)    |
|                            | US                                                                                                                                                                                         | 0.03 (-0.19 to 0.25)                             | -0.07 (-0.35 to 0.21)   | 10.8 (8.80 to 12.80) | 0.10 (-3.28 to 3.48)    |
| <b>Treatment regimens</b>  | Fixed dosing or Treatment and extend                                                                                                                                                       | -0.11 (-0.15 to -0.07)                           | -0.05 (-0.15 to 0.04)   | 7.22 (6.74 to 7.71)  | 1.00 (0.45 to 1.56)     |
|                            | 3 monthly injections + PRN                                                                                                                                                                 | -0.13 (-0.17 to -0.09)                           | -0.05 (-0.11 to 0.01)   | 4.97 (4.37 to 5.57)  | -0.93 (-2.07 to 0.22)   |
| <b>Subtypes of wet AMD</b> | Typical                                                                                                                                                                                    | -0.13 (-0.19 to -0.07)                           | -0.03 (-0.12 to 0.06)   | 4.78 (4.19 to 5.36)  | -0.10 (-0.60 to 0.39)   |
|                            | PCV                                                                                                                                                                                        | -0.13 (-0.20 to -0.06)                           | -0.03 (-0.13 to 0.08)   | 5.13 (4.33 to 5.94)  | -0.38 (-0.91 to 0.14)   |
|                            | With PED                                                                                                                                                                                   | 0.03 (-0.19 to 0.25)                             | -0.07 (-0.35 to 0.21)   | 10.8 (8.80 to 12.80) | 0.10 (-3.28 to 3.48)    |
| <b>Note</b>                | LogMAR = logarithm of minimum angle of resolution; CRT = central retinal thickness; CI = confidence interval; PCV = polypoidal choroidal vasculopathy; PED = pigment epithelial detachment |                                                  |                         |                      |                         |
